# Supplementary material for: NMR probe effects on trans-philicity and trans-influence ladders in square planar Pt(ii) complexes
Source: Royal Society of Chemistry journal article supplement (doi:10.1039/d0nj01336f), 2020-01-01
Supplement: d0nj01336f1.pdf [file d0nj01336f1.pdf]

## Supplementary Information

### **NMR Probe Effects on *trans*-Philicity and *trans*-Influence Ladders in Square Planar Pt(II) Complexes**

**Athanasios C. Tsipis**

*Laboratory of Inorganic Chemistry, Department of Chemistry, University of Ioannina, Ioannina  
45110, Greece*

| <b>Contents</b>                                                                                                                                                                                                                                                                                                                                                                                                                         | <b>pages</b> |
|-----------------------------------------------------------------------------------------------------------------------------------------------------------------------------------------------------------------------------------------------------------------------------------------------------------------------------------------------------------------------------------------------------------------------------------------|--------------|
| <b>Table S1.</b> $^1\text{H}$ NMR Hydride Shifts (in ppm vs TMS) for selected <i>trans</i> -[Pt(PMe <sub>3</sub> )(H)(L)] <sup>0/+</sup> complexes calculated by the PBE0/SARC-ZORA(Pt) $\cup$ 6-31+G(d)(E)/PCM computational protocol in benzene solution and compared to $^1\text{H}$ NMR Hydride Shifts calculated by the PBE0/Def2-TZVP (ECP)/COSMOS computational protocol in benzene solution and to experimental data available. | S3           |
| <b>Table S2.</b> <i>R</i> (Pt-H) bond lengths (in Å) for selected <i>trans</i> -[Pt(PMe <sub>3</sub> ) <sub>2</sub> (H)(L)] <sup>0/+</sup> complexes calculated by the PBE0/SARC-ZORA(Pt) $\cup$ 6-31+G(d)(E)/PCM computational protocol and compared to <i>R</i> (Pt-H) bond lengths calculated by the PBE0/Def2-TZVP (ECP) computational protocol in the gas phase.                                                                   | S3           |
| <b>Table S1.</b> $\sigma^{\text{iso}}(\text{SO})$ $^1\text{H}$ NMR <i>trans</i> -philicity descriptors (in ppm) for the <i>trans</i> -[Pt(PMe <sub>3</sub> ) <sub>2</sub> (H)L] <sup>0/+</sup> complexes calculated at the 2c-SO-ZORA level of theory.                                                                                                                                                                                  | S4           |
| <b>Table S2.</b> $\sigma^{\text{iso}}(\text{SO})$ $^{13}\text{CH}_3$ NMR <i>trans</i> -philicity descriptors (in ppm) for the <i>trans</i> -[Pt(PMe <sub>3</sub> ) <sub>2</sub> (CH <sub>3</sub> )L] <sup>0/+</sup> complexes calculated at the 2c-SO-ZORA level of theory.                                                                                                                                                             | S5           |
| <b>Table S3.</b> $\sigma^{\text{iso}}(\text{SO})$ $^{13}\text{CO}$ NMR <i>trans</i> -philicity descriptors (in ppm) for the <i>trans</i> -[Pt(PMe <sub>3</sub> ) <sub>2</sub> (CO)L] <sup>+2+</sup> complexes calculated at the 2c-SO-ZORA level of theory                                                                                                                                                                              | S6           |
| <b>Table S4.</b> $\sigma^{\text{iso}}(\text{SO})$ $^{15}\text{NH}_2$ NMR <i>trans</i> -philicity descriptors (in ppm) for the <i>trans</i> -[Pt(PMe <sub>3</sub> ) <sub>2</sub> (NH <sub>2</sub> )L] <sup>0/+</sup> complexes calculated at the 2c-SO-ZORA level of theory.                                                                                                                                                             | S7           |
| <b>Table S5.</b> $\sigma^{\text{iso}}(\text{SO})$ $^{17}\text{OH}_2$ NMR <i>trans</i> -philicity descriptors (in ppm) for the <i>trans</i> -[Pt(PMe <sub>3</sub> ) <sub>2</sub> (OH <sub>2</sub> )L] <sup>+2+</sup> complexes calculated at the 2c-SO-ZORA (SO) level of theory                                                                                                                                                         | S8           |
| <b>Table S6.</b> $\sigma^{\text{iso}}(\text{SO})$ $^{35}\text{Cl}$ NMR <i>trans</i> -philicity descriptors (in ppm) for the <i>trans</i> -[Pt(PMe <sub>3</sub> ) <sub>2</sub> (Cl)L] <sup>0/+</sup> complexes calculated at the 2c-SO-ZORA level of theory                                                                                                                                                                              | S9           |
| <b>Figure S1.</b> Linear plots of the $\sigma^{\text{iso}}(\text{SO})$ X (X = $^{13}\text{CH}_3$ , $^{15}\text{NH}_2$ , $^{35}\text{Cl}$ ) vs $P_L$ correlations for square planar <i>trans</i> -[Pt(PMe <sub>3</sub> ) <sub>2</sub> (X)L] <sup>0/+</sup> (X = X = CH <sub>3</sub> , NH <sub>2</sub> , Cl) complexes calculated by the GIAO(2c-SO-ZORA)/PBE0/TZ2P/COSMO computational protocol in benzene solution.                     | S10          |
| <b>Figure S2.</b> Linear plots of the $\sigma^{\text{iso}}(\text{SO})$ X (X = CH <sub>3</sub> , NH <sub>2</sub> , Cl) shieldings vs <i>R</i> (Pt-X) correlations for square planar <i>trans</i> -[Pt(PMe <sub>3</sub> ) <sub>2</sub> (X)L] <sup>0/+</sup> (X = CH <sub>3</sub> , NH <sub>2</sub> , Cl) complexes calculated by the GIAO(2c-SO-ZORA)/PBE0/TZ2P/COSMO computational protocol in benzene solution.                         | S11          |
| <b>Figure S3.</b> Linear plots of the $\sigma^{\text{iso}}(\text{SO})$ X (X = CH <sub>3</sub> , NH <sub>2</sub> , Cl) shieldings vs <i>WBI</i> (Pt-X) correlations for square planar <i>trans</i> -[Pt(PMe <sub>3</sub> ) <sub>2</sub> (X)L] <sup>0/+</sup> (X = CH <sub>3</sub> , NH <sub>2</sub> , Cl) complexes calculated by the GIAO(2c-SO-ZORA)/PBE0/TZ2P/COSMO computational protocol in benzene solution.                       | S12          |
| <b>Figure S4.</b> Linear plots of the $\sigma^{\text{iso}}(\text{SO})$ X (X = CH <sub>3</sub> , NH <sub>2</sub> , Cl) shieldings vs $Q_{\text{Pt}}$ correlations for square planar <i>trans</i> -[Pt(PMe <sub>3</sub> ) <sub>2</sub> (X)L] <sup>0/+</sup> (X = CH <sub>3</sub> , NH <sub>2</sub> , Cl) complexes calculated by the GIAO(2c-SO-ZORA)/PBE0/TZ2P/COSMO computational protocol in benzene solution.                         | S13          |

**Table S1.**  $^1\text{H}$  NMR Hydride Shifts (in ppm vs TMS) for selected  $\text{trans-}[\text{Pt}(\text{PMe}_3)_2(\text{H})(\text{L})]^{0/+}$  complexes calculated by the GIAO (SO-ZORA)/PBE0/TZ2P/COSMO computational protocol in benzene solution and compared to  $^1\text{H}$  NMR Hydride Shifts given by Kaupp's group<sup>30</sup> and to experimental data available.<sup>40-44</sup>

| Complex                                                              | $\sigma^{\text{iso}}(^1\text{H})^{\text{a}}$ | $\delta_{\text{calcd}}(^1\text{H})^{\text{a}}$ | $\delta_{\text{calcd}}(^1\text{H})^{\text{b}}$ | $\delta_{\text{exptl}}(^1\text{H})$ | Ref.                  |
|----------------------------------------------------------------------|----------------------------------------------|------------------------------------------------|------------------------------------------------|-------------------------------------|-----------------------|
| $\text{trans-}[\text{Pt}(\text{PMe}_3)(\text{H})(\text{H})]$         | 35.3 (35.1) <sup>c</sup>                     | -3.3 (-3.1) <sup>c</sup>                       |                                                | -2.7                                | 43                    |
| $\text{trans-}[\text{Pt}(\text{PMe}_3)_2(\text{H})(\text{Cl})]$      | 54.0 (54.1)                                  | -22.0 (-22.1)                                  | -16.2                                          | [-16.2] -16.9                       | [44], 40 <sup>d</sup> |
| $\text{trans-}[\text{Pt}(\text{PMe}_3)_2(\text{H})(\text{Br})]$      | 51.8 (51.9)                                  | -19.8 (-19.9)                                  | -15.0                                          | -15.6                               | 40                    |
| $\text{trans-}[\text{Pt}(\text{PMe}_3)_2(\text{H})(\text{CN})]$      | 43.4 (43.3)                                  | -11.4 (-11.3)                                  | -6.7                                           | -7.8                                | 40                    |
| $\text{trans-}[\text{Pt}(\text{PMe}_3)_2(\text{H})(\text{NCMe})]^+$  | 56.9 (57.0)                                  | -24.9 (-15.0)                                  |                                                | -18.7                               | 42 <sup>e</sup>       |
| $\text{trans-}[\text{Pt}(\text{PMe}_3)_2(\text{H})(\text{SCN})]$     | 50.5 (50.6)                                  | -18.5 (-18.6)                                  | -12.2                                          | -13.3                               | 40                    |
| $\text{trans-}[\text{Pt}(\text{PMe}_2)(\text{H})(\text{NO}_2)]$      | 56.8 (56.9)                                  | -24.8 (-24.9)                                  | -19.0                                          | -19.7                               | 40                    |
| $\text{trans-}[\text{Pt}(\text{PMe}_3)_2(\text{H})(\text{NO}_3)]$    | 61.6 (61.7)                                  | -29.6 (-29.7)                                  | -23.6                                          | -23.8                               | 40                    |
| $\text{trans-}[\text{Pt}(\text{PMe}_3)_2(\text{H})(\text{OH})]$      | 54.7 (54.7)                                  | -22.7 (-22.7)                                  |                                                | -10.0                               | 42                    |
| $\text{trans-}[\text{Pt}(\text{PMe}_3)_2(\text{H})(\text{OH}_2)]^+$  | 67.0 (67.3)                                  | -35.0 (-35.3)                                  |                                                | -25.4                               | 42                    |
| $\text{trans-}[\text{Pt}(\text{PMe}_3)_2(\text{H})(\text{PMe}_3)]^+$ | 44.0 (44.0)                                  | -12.0 (-12.0)                                  |                                                | -12.8                               | 43                    |
| $\text{trans-}[\text{Pt}(\text{PMe}_3)_2(\text{H})(\text{Me})]$      | 37.4 (37.3)                                  | -5.4 (-5.3)                                    | -4.2                                           | -3.8 [-2.1]                         | [41] <sup>f</sup>     |
| $\text{trans-}[\text{Pt}(\text{PMe}_2)(\text{H})(\text{Ph})]$        | 39.8 (39.7)                                  | -7.8 (-7.7)                                    | -6.3                                           | -5.7                                |                       |

<sup>a</sup>  $^1\text{H}$  NMR Hydride Shifts calculated at the GIAO (SO-ZORA)/PBE0/TZ2P/COSMO level. <sup>b</sup>  $^1\text{H}$  NMR Hydride Shifts calculated by Kaupp's group (taken from Ref. 30). <sup>c</sup> Figures in parentheses are the  $^1\text{H}$  NMR Hydride Shifts calculated at the GIAO (SO-ZORA)/PBE0/TZ2P-J/COSMO level of theory. <sup>d</sup> The  $\delta_{\text{exptl}}(^1\text{H})$  data given in Ref. 40 refer to the  $\text{trans-}[\text{Pt}(\text{PEt}_3)_2(\text{H})(\text{Cl})]$  complexes. <sup>e</sup> The  $\delta_{\text{exptl}}(^1\text{H})$  data given in Ref. 42 refer to the  $\text{trans-}[\text{Pt}(\text{PPh}_3)_2(\text{H})(\text{OH}_2)]^+$  and  $\text{trans-}[\text{Pt}(\text{PPh}_3)_2(\text{H})(\text{NCMe})]^+$  complexes. <sup>f</sup> The  $\delta_{\text{exptl}}(^1\text{H})$  data given in Ref. 41 refer to the  $\text{trans-}[\text{Pt}(\text{PPh}_3)_2(\text{H})(\text{Me})]$  complexes.

**Table S2.**  $R(\text{Pt-H})$  bond lengths (in Å) for selected  $\text{trans-}[\text{Pt}(\text{PMe}_3)_2(\text{H})(\text{L})]^{0/+}$  complexes calculated by the PBE0/SARC-ZORA(Pt)  $\cup$  6-31+G(d)(E)/PCM computational protocol and compared to  $R(\text{Pt-H})$  bond lengths calculated by the PBE0/Def2-TZVP (ECP) computational protocol in the gas phase.<sup>a</sup>

| Complex                                                           | $R(\text{Pt-H})$                                    |                                  | $\Delta R(\text{Pt-H})$ |
|-------------------------------------------------------------------|-----------------------------------------------------|----------------------------------|-------------------------|
|                                                                   | PBE0/SARC-ZORA(Pt) $\cup$ 6-31+G(d)(E)/PCM(benzene) | PBE0/Def2-TZVP (ECP) (gas phase) |                         |
| $\text{trans-}[\text{Pt}(\text{PMe}_3)_2(\text{H})(\text{Cl})]$   | 1.616                                               | 1.565                            | 0.051                   |
| $\text{trans-}[\text{Pt}(\text{PMe}_3)_2(\text{H})(\text{Br})]$   | 1.620                                               | 1.566                            | 0.054                   |
| $\text{trans-}[\text{Pt}(\text{PMe}_3)_2(\text{H})(\text{CN})]$   | 1.654                                               | 1.609                            | 0.045                   |
| $\text{trans-}[\text{Pt}(\text{PMe}_3)_2(\text{H})(\text{SCN})]$  | 1.625                                               | 1.576                            | 0.049                   |
| $\text{trans-}[\text{Pt}(\text{PMe}_2)(\text{H})(\text{NO}_2)]$   | 1.627                                               | 1.582                            | 0.045                   |
| $\text{trans-}[\text{Pt}(\text{PMe}_3)_2(\text{H})(\text{NO}_3)]$ | 1.599                                               | 1.548                            | 0.051                   |
| $\text{trans-}[\text{Pt}(\text{PMe}_3)_2(\text{H})(\text{Me})]$   | 1.699                                               | 1.636                            | 0.063                   |
| $\text{trans-}[\text{Pt}(\text{PMe}_2)(\text{H})(\text{Ph})]$     | 1.693                                               | 1.628                            | 0.065                   |

MO. = **0.053**

<sup>a</sup> Taken from Ref. 30.

**Table S3.**  $\sigma^{\text{iso}}(\text{SO})$   $^1\text{H}$  NMR *trans*-philicity descriptors (in ppm) for the *trans*-[Pt(PMe<sub>3</sub>)<sub>2</sub>(H)L]<sup>0/+</sup> complexes calculated at the 2c-SO-ZORA level of theory employing the GIAO(SO)/PBE0/TZ2P/COSMO computational protocol in benzene solution.

| Ligand                                         | $\sigma^{\text{iso}}(\text{SO})$ $^1\text{H}$ NMR |
|------------------------------------------------|---------------------------------------------------|
| F <sup>-</sup>                                 | 60.80                                             |
| H <sub>2</sub> O                               | 67.02                                             |
| OCN <sup>-</sup>                               | 63.01                                             |
| OBr                                            | 59.29                                             |
| NO <sub>3</sub> <sup>-</sup>                   | 61.57                                             |
| OCl <sup>-</sup>                               | 59.29                                             |
| CCl <sub>3</sub> COO <sup>-</sup>              | 60.60                                             |
| CH <sub>3</sub> COO <sup>-</sup>               | 58.76                                             |
| HCOO <sup>-</sup>                              | 58.84                                             |
| C <sub>6</sub> H <sub>5</sub> COO <sup>-</sup> | 58.45                                             |
| OF <sup>-</sup>                                | 57.54                                             |
| OH <sup>-</sup>                                | 54.68                                             |
| NO <sub>2</sub> <sup>-</sup>                   | 56.79                                             |
| NCS <sup>-</sup>                               | 54.80                                             |
| NCMe                                           | 56.89                                             |
| Py                                             | 57.60                                             |
| NCH                                            | 57.05                                             |
| NH <sub>3</sub>                                | 56.49                                             |
| NCPH                                           | 56.03                                             |
| N <sub>3</sub> <sup>-</sup>                    | 54.92                                             |
| N <sub>2</sub>                                 | 57.97                                             |
| Cl <sup>-</sup>                                | 53.97                                             |
| NH <sub>2</sub> <sup>-</sup>                   | 46.95                                             |
| Br <sup>-</sup>                                | 51.80                                             |
| SCN <sup>-</sup>                               | 50.54                                             |
| H <sub>2</sub> S                               | 52.13                                             |
| SH <sup>-</sup>                                | 46.17                                             |
| CN <sup>-</sup>                                | 43.40                                             |
| CNMe                                           | 44.56                                             |
| NHC                                            | 43.91                                             |
| CNH                                            | 43.90                                             |
| CNPh                                           | 43.55                                             |
| <i>t</i> -Bu <sup>-</sup>                      | 41.37                                             |
| Ph <sup>-</sup>                                | 39.83                                             |
| PMe <sub>3</sub>                               | 44.00                                             |
| CO                                             | 42.34                                             |
| PPh <sub>3</sub>                               | 43.82                                             |
| Me <sup>-</sup>                                | 37.40                                             |
| PH <sub>3</sub>                                | 43.01                                             |
| PF <sub>3</sub>                                | 41.53                                             |
| SnCl <sub>3</sub> <sup>-</sup>                 | 44.07                                             |
| H <sup>-</sup>                                 | 35.29                                             |
| B(OH) <sub>2</sub> <sup>-</sup>                | 29.27                                             |
| BH <sub>2</sub> <sup>-</sup>                   | 28.30                                             |

**Table S4.**  $\sigma^{\text{iso}}(\text{SO})$   $^{13}\text{C}$  NMR *trans*-philicity descriptors (in ppm) for the *trans*-[Pt(PMe<sub>3</sub>)<sub>2</sub>(CH<sub>3</sub>)L]<sup>0/+</sup> complexes calculated at the 2c-SO-ZORA level of theory employing the GIAO(SO)/PBE0/TZ2P/COSMO computational protocol in benzene solution.

| Ligand                                         | $\sigma^{\text{iso}}(\text{SO})$ $^{13}\text{C}$ NMR |
|------------------------------------------------|------------------------------------------------------|
| BH <sub>2</sub> <sup>-</sup>                   | 193.86                                               |
| Ph <sup>-</sup>                                | 215.24                                               |
| B(OH) <sub>2</sub> <sup>-</sup>                | 192.91                                               |
| Me <sup>-</sup>                                | 210.27                                               |
| CN <sup>-</sup>                                | 214.48                                               |
| F <sup>-</sup>                                 | 239.83                                               |
| H <sup>-</sup>                                 | 201.13                                               |
| OF <sup>-</sup>                                | 233.19                                               |
| OH <sup>-</sup>                                | 232.07                                               |
| NH <sub>2</sub> <sup>-</sup>                   | 220.16                                               |
| OCl <sup>-</sup>                               | 233.19                                               |
| OB <sup>r</sup>                                | 234.79                                               |
| Cl <sup>-</sup>                                | 224.55                                               |
| NO <sub>2</sub> <sup>-</sup>                   | 229.94                                               |
| <i>t</i> -Bu <sup>-</sup>                      | 223.47                                               |
| NCS <sup>-</sup>                               | 228.17                                               |
| Br <sup>-</sup>                                | 219.59                                               |
| N <sub>3</sub> <sup>-</sup>                    | 225.45                                               |
| SH <sup>-</sup>                                | 214.84                                               |
| CH <sub>3</sub> COO <sup>-</sup>               | 232.36                                               |
| C <sub>6</sub> H <sub>5</sub> COO <sup>-</sup> | 232.16                                               |
| HCOO <sup>-</sup>                              | 231.47                                               |
| NHC                                            | 211.13                                               |
| NO <sub>3</sub> <sup>-</sup>                   | 233.12                                               |
| CCl <sub>3</sub> COO <sup>-</sup>              | 231.15                                               |
| OCN <sup>-</sup>                               | 232.53                                               |
| SCN <sup>-</sup>                               | 215.77                                               |
| Py                                             | 223.82                                               |
| CNPh                                           | 204.51                                               |
| NCP <sup>h</sup>                               | 219.14                                               |
| NCMe                                           | 219.98                                               |
| CNMe                                           | 204.50                                               |
| NCH                                            | 217.93                                               |
| CNH                                            | 202.44                                               |
| NH <sub>3</sub>                                | 219.14                                               |
| SnCl <sub>3</sub> <sup>-</sup>                 | 200.82                                               |
| H <sub>2</sub> O                               | 225.03                                               |
| CO                                             | 196.78                                               |
| PMe <sub>3</sub>                               | 199.17                                               |
| N <sub>2</sub>                                 | 211.72                                               |
| H <sub>2</sub> S                               | 206.55                                               |
| PP <sup>h</sup> <sub>3</sub>                   | 197.60                                               |
| PH <sub>3</sub>                                | 176.78                                               |
| PF <sub>3</sub>                                | 189.50                                               |

**Table S5.**  $\sigma^{\text{iso}}(\text{SO})$   $^{13}\text{C}$ O NMR *trans*-philicity descriptors (in ppm) for the *trans*-[Pt(PMe<sub>3</sub>)<sub>2</sub>(CO)L]<sup>+2+</sup> complexes calculated at the 2c-SO-ZORA level of theory employing the GIAO(SO)/PBE0/TZ2P/COSMO computational protocol in benzene solution.

| Ligand                                         | $\sigma^{\text{iso}}(\text{SO})$ $^{13}\text{C}$ O NMR |
|------------------------------------------------|--------------------------------------------------------|
| H <sub>2</sub> O                               | 48.79                                                  |
| N <sub>2</sub>                                 | 42.27                                                  |
| NCH                                            | 36.23                                                  |
| OCN <sup>-</sup>                               | 34.49                                                  |
| NcMe                                           | 34.18                                                  |
| NcPh                                           | 32.79                                                  |
| NO <sub>3</sub> <sup>-</sup>                   | 29.83                                                  |
| NH <sub>3</sub>                                | 29.62                                                  |
| F <sup>-</sup>                                 | 29.34                                                  |
| Py                                             | 28.98                                                  |
| CCl <sub>3</sub> COO <sup>-</sup>              | 28.16                                                  |
| H <sub>2</sub> S                               | 27.10                                                  |
| HCOO <sup>-</sup>                              | 25.53                                                  |
| CH <sub>3</sub> COO <sup>-</sup>               | 25.08                                                  |
| NCS <sup>-</sup>                               | 24.61                                                  |
| C <sub>6</sub> H <sub>5</sub> COO <sup>-</sup> | 24.17                                                  |
| OCl <sup>-</sup>                               | 23.72                                                  |
| OB <sup>-</sup>                                | 23.15                                                  |
| Cl <sup>-</sup>                                | 22.65                                                  |
| OF <sup>-</sup>                                | 22.52                                                  |
| Br <sup>-</sup>                                | 22.39                                                  |
| CO                                             | 22.10                                                  |
| NO <sub>2</sub> <sup>-</sup>                   | 20.63                                                  |
| OH <sup>-</sup>                                | 19.88                                                  |
| N <sub>3</sub> <sup>-</sup>                    | 19.66                                                  |
| PF <sub>3</sub>                                | 18.00                                                  |
| CNMe                                           | 17.87                                                  |
| CNPh                                           | 17.08                                                  |
| SCN <sup>-</sup>                               | 14.77                                                  |
| PH <sub>3</sub>                                | 13.93                                                  |
| PMe <sub>3</sub>                               | 11.31                                                  |
| NHC                                            | 10.69                                                  |
| CNH                                            | 10.69                                                  |
| PPh <sub>3</sub>                               | 9.73                                                   |
| NH <sub>2</sub> <sup>-</sup>                   | 9.40                                                   |
| SH <sup>-</sup>                                | 8.71                                                   |
| CN <sup>-</sup>                                | 8.33                                                   |
| SnCl <sub>3</sub> <sup>-</sup>                 | 2.95                                                   |
| Ph <sup>-</sup>                                | -2.13                                                  |
| Me <sup>-</sup>                                | -2.57                                                  |
| H <sup>-</sup>                                 | -7.85                                                  |
| t-Bu <sup>-</sup>                              | -9.55                                                  |
| B(OH) <sub>2</sub> <sup>-</sup>                | -13.76                                                 |
| BH <sub>2</sub> <sup>-</sup>                   | -17.16                                                 |

**Table S6.**  $\sigma^{\text{iso}}(\text{SO})$   $^{15}\text{NH}_2$  NMR *trans*-philicity descriptors (in ppm) for the *trans*-[Pt(PMe<sub>3</sub>)<sub>2</sub>(NH<sub>2</sub>)L]<sup>0/+</sup> complexes calculated at the 2c-SO-ZORA (SO) level of theory employing the GIAO(SO)/PBE0/TZ2P/COSMO computational protocol in benzene solution.

| Ligand                                         | $\sigma^{\text{iso}}(\text{SO})$ |
|------------------------------------------------|----------------------------------|
| OH <sup>-</sup>                                | 322.54                           |
| HCOO <sup>-</sup>                              | 315.45                           |
| CH <sub>3</sub> COO <sup>-</sup>               | 317.53                           |
| NH <sub>2</sub> <sup>-</sup>                   | 313.56                           |
| C <sub>6</sub> H <sub>5</sub> COO <sup>-</sup> | 316.72                           |
| NO <sub>3</sub> <sup>-</sup>                   | 305.93                           |
| F <sup>-</sup>                                 | 306.50                           |
| Py                                             | 298.64                           |
| NH <sub>3</sub>                                | 297.78                           |
| H <sub>2</sub> O                               | 285.89                           |
| OBr                                            | 305.20                           |
| B(OH) <sub>2</sub> <sup>-</sup>                | 311.65                           |
| OCl <sup>-</sup>                               | 304.63                           |
| NCH                                            | 293.78                           |
| OF <sup>-</sup>                                | 300.35                           |
| CCl <sub>3</sub> COO <sup>-</sup>              | 311.66                           |
| <i>t</i> -Bu <sup>-</sup>                      | 280.36                           |
| OCN <sup>-</sup>                               | 288.35                           |
| NO <sub>2</sub> <sup>-</sup>                   | 288.65                           |
| N <sub>2</sub>                                 | 277.00                           |
| N <sub>3</sub> <sup>-</sup>                    | 284.99                           |
| NCS <sup>-</sup>                               | 290.13                           |
| Ph <sup>-</sup>                                | 277.06                           |
| CNH                                            | 279.14                           |
| CNMe                                           | 279.46                           |
| Cl <sup>-</sup>                                | 277.26                           |
| PMe <sub>3</sub>                               | 271.20                           |
| Me <sup>-</sup>                                | 266.73                           |
| PH <sub>3</sub>                                | 266.41                           |
| Br <sup>-</sup>                                | 268.73                           |
| BH <sub>2</sub> <sup>-</sup>                   | 226.80                           |
| SCN <sup>-</sup>                               | 264.58                           |
| SH <sup>-</sup>                                | 263.87                           |
| H <sup>-</sup>                                 | 255.34                           |
| NCMe                                           | 267.37                           |
| NCPH                                           | 266.50                           |
| CN <sup>-</sup>                                | 268.83                           |
| NHC                                            | 257.33                           |
| PF <sub>3</sub>                                | 250.14                           |
| H <sub>2</sub> S                               | 240.63                           |
| CNPh                                           | 240.05                           |
| SnCl <sub>3</sub> <sup>-</sup>                 | 230.32                           |
| PPh <sub>3</sub>                               | 223.89                           |
| CO                                             | 224.48                           |

**Table S7.**  $\sigma^{\text{iso}}(\text{SO})$   $^{17}\text{OH}_2$  NMR *trans*-philicity descriptors (in ppm) for the *trans*- $[\text{Pt}(\text{PMe}_3)_2(\text{OH}_2)\text{L}]^{+2+}$  complexes calculated at the 2c-SO-ZORA (SO) level of theory employing the GIAO(SO)/PBE0/TZ2P/COSMO computational protocols in benzene solution.

| Ligand                                         | $\sigma^{\text{iso}}(\text{SO})$ $^{17}\text{OH}_2$ NMR |
|------------------------------------------------|---------------------------------------------------------|
| H <sub>2</sub> O                               | 513.76                                                  |
| F <sup>-</sup>                                 | 463.62                                                  |
| OCN <sup>-</sup>                               | 452.51                                                  |
| NO <sub>3</sub> <sup>-</sup>                   | 456.87                                                  |
| CCl <sub>3</sub> COO <sup>-</sup>              | 447.87                                                  |
| CH <sub>3</sub> COO <sup>-</sup>               | 441.37                                                  |
| C <sub>6</sub> H <sub>5</sub> COO <sup>-</sup> | 441.72                                                  |
| N <sub>2</sub>                                 | 450.34                                                  |
| HCOO <sup>-</sup>                              | 441.52                                                  |
| OBr                                            | 425.93                                                  |
| NCH                                            | 446.24                                                  |
| NH <sub>3</sub>                                | 439.67                                                  |
| OH <sup>-</sup>                                | 426.28                                                  |
| OCI <sup>-</sup>                               | 423.54                                                  |
| NCS <sup>-</sup>                               | 431.83                                                  |
| Py                                             | 434.83                                                  |
| OF <sup>-</sup>                                | 419.11                                                  |
| NO <sub>2</sub> <sup>-</sup>                   | 417.74                                                  |
| Cl <sup>-</sup>                                | 409.95                                                  |
| NCMe                                           | 427.00                                                  |
| N <sub>3</sub> <sup>-</sup>                    | 402.78                                                  |
| H <sub>2</sub> S                               | 407.34                                                  |
| NCPH                                           | 434.02                                                  |
| CNMe                                           | 406.90                                                  |
| CNH                                            | 411.75                                                  |
| CN <sup>-</sup>                                | 408.87                                                  |
| NH <sub>2</sub> <sup>-</sup>                   | 389.45                                                  |
| SCN <sup>-</sup>                               | 386.89                                                  |
| NHC                                            | 372.09                                                  |
| CO                                             | 397.80                                                  |
| PF <sub>3</sub>                                | 383.92                                                  |
| Br                                             | 383.52                                                  |
| PH <sub>3</sub>                                | 379.36                                                  |
| CNPh                                           | 386.44                                                  |
| SH <sup>-</sup>                                | 361.08                                                  |
| Me <sup>-</sup>                                | 362.59                                                  |
| B(OH) <sub>2</sub> <sup>-</sup>                | 350.33                                                  |
| PPh <sub>3</sub>                               | 358.63                                                  |
| PMe <sub>3</sub>                               | 359.46                                                  |
| Ph <sup>-</sup>                                | 359.72                                                  |
| H <sup>-</sup>                                 | 356.79                                                  |
| SnCl <sub>3</sub> <sup>-</sup>                 | 344.63                                                  |
| <i>t</i> -Bu <sup>-</sup>                      | 323.37                                                  |
| BH <sub>2</sub> <sup>-</sup>                   | 327.04                                                  |



**Table S8.**  $\sigma^{\text{iso}}(\text{SO})$   $^{35}\text{Cl}$  NMR *trans*-philicity descriptors (in ppm) for the *trans*-[Pt(PMe<sub>3</sub>)<sub>2</sub>(Cl)L]<sup>0/+</sup> complexes calculated at the 2c-SO-ZORA (SO) level of theory employing the GIAO(SO)/PBE0/TZ2P/COSMO computational protocol in benzene solution.

| Ligand                                         | $\sigma^{\text{iso}}(\text{SO})$ $^{35}\text{Cl}$ NMR |
|------------------------------------------------|-------------------------------------------------------|
| F <sup>-</sup>                                 | 1225.20                                               |
| OBr <sup>-</sup>                               | 1203.85                                               |
| OCN <sup>-</sup>                               | 1176.67                                               |
| OCl <sup>-</sup>                               | 1202.23                                               |
| NO <sub>3</sub> <sup>-</sup>                   | 1186.38                                               |
| OH <sup>-</sup>                                | 1204.76                                               |
| CH <sub>3</sub> COO <sup>-</sup>               | 1189.16                                               |
| OF <sup>-</sup>                                | 1193.92                                               |
| C <sub>6</sub> H <sub>5</sub> COO <sup>-</sup> | 1188.74                                               |
| CCl <sub>3</sub> COO <sup>-</sup>              | 1177.68                                               |
| HCOO <sup>-</sup>                              | 1182.18                                               |
| NO <sub>2</sub> <sup>-</sup>                   | 1187.39                                               |
| NCS <sup>-</sup>                               | 1173.53                                               |
| H <sub>2</sub> O                               | 1096.56                                               |
| N <sub>3</sub> <sup>-</sup>                    | 1160.22                                               |
| NH <sub>2</sub> <sup>-</sup>                   | 1166.19                                               |
| Py                                             | 1129.75                                               |
| Cl <sup>-</sup>                                | 1129.33                                               |
| Ph <sup>-</sup>                                | 1154.24                                               |
| Br <sup>-</sup>                                | 1112.91                                               |
| NH <sub>3</sub>                                | 1101.96                                               |
| Me <sup>-</sup>                                | 1137.19                                               |
| NCMe                                           | 1097.13                                               |
| CN <sup>-</sup>                                | 1129.32                                               |
| NCPH                                           | 1095.76                                               |
| H <sup>-</sup>                                 | 1129.00                                               |
| SH <sup>-</sup>                                | 1105.04                                               |
| BH <sub>2</sub> <sup>-</sup>                   | 1123.03                                               |
| NCH                                            | 1079.90                                               |
| SCN <sup>-</sup>                               | 1086.11                                               |
| B(OH) <sub>2</sub> <sup>-</sup>                | 1117.91                                               |
| NHC                                            | 1096.59                                               |
| <i>t</i> -Bu <sup>-</sup>                      | 1094.34                                               |
| N <sub>2</sub>                                 | 1021.80                                               |
| CNMe                                           | 1052.94                                               |
| CNPh                                           | 1041.67                                               |
| CNH                                            | 1037.34                                               |
| H <sub>2</sub> S                               | 1002.84                                               |
| SnCl <sub>3</sub> <sup>-</sup>                 | 1005.93                                               |
| PPh <sub>3</sub>                               | 998.39                                                |
| PMe <sub>3</sub>                               | 995.56                                                |
| PH <sub>3</sub>                                | 983.81                                                |
| CO                                             | 989.68                                                |
| PF <sub>3</sub>                                | 940.66                                                |

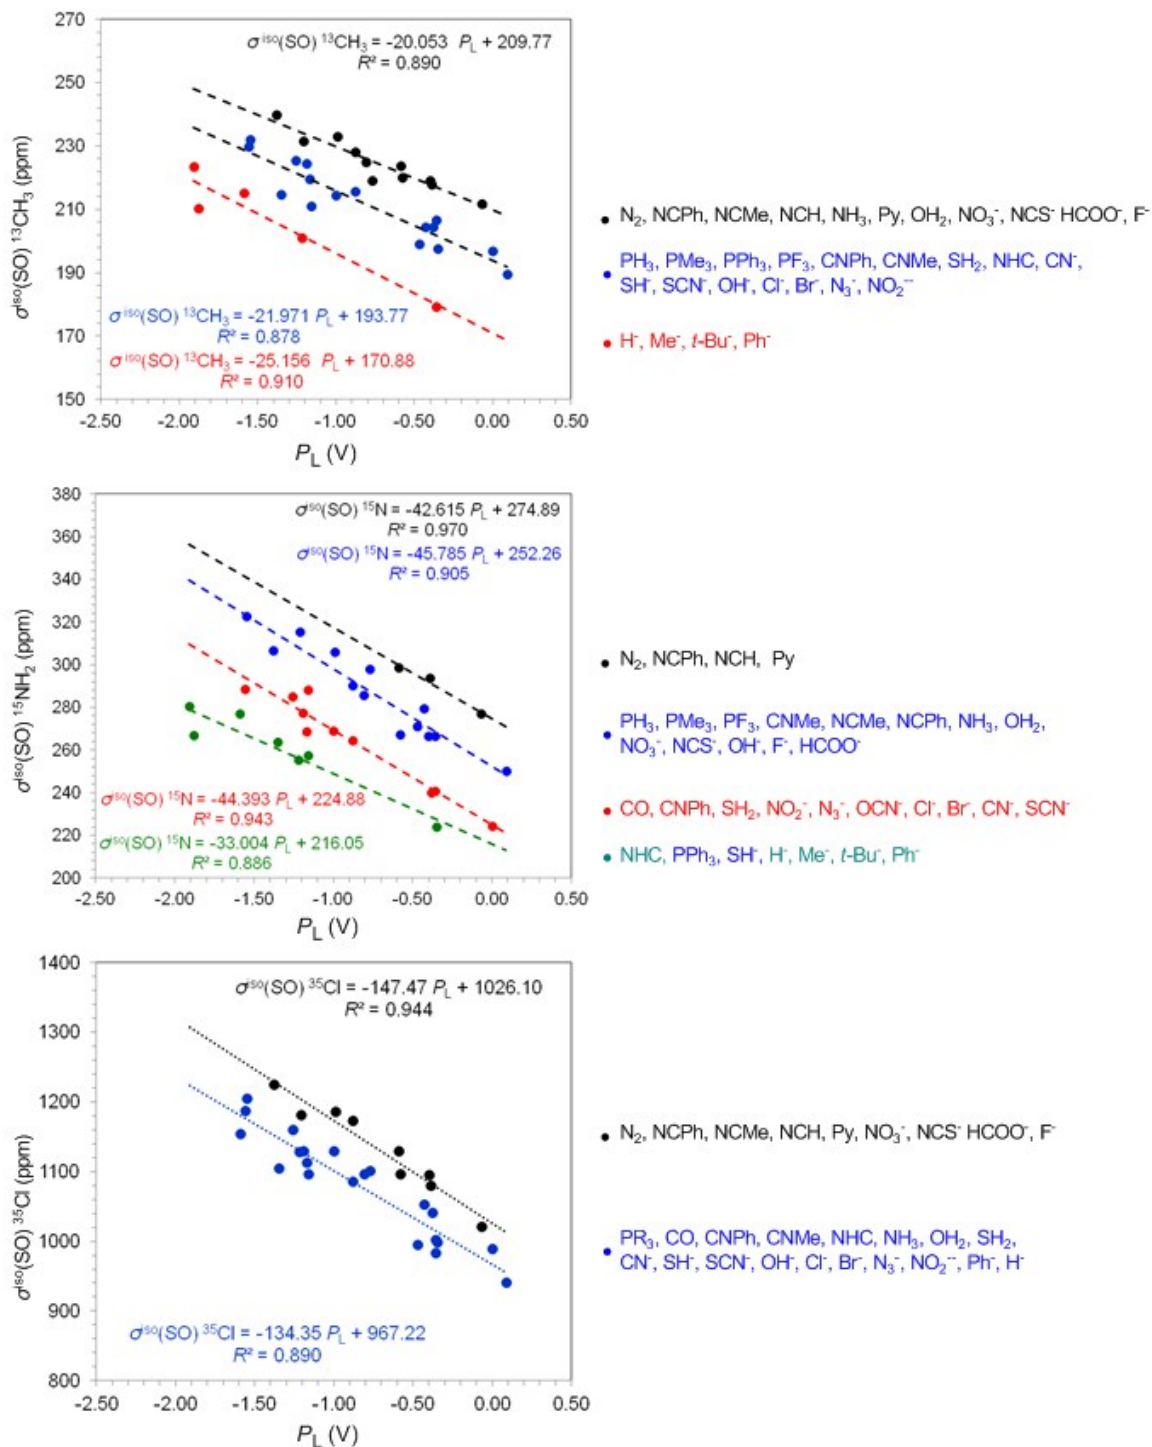

**Figure S1.** Linear plots of the  $\sigma^{\text{iso}}(\text{SO})$  X (X =  $^{13}\text{CH}_3$ ,  $^{15}\text{NH}_2$ ,  $^{35}\text{Cl}$ ) vs  $P_L$  correlations for square planar *trans*- $[\text{Pt}(\text{PMe}_3)_2(\text{X})\text{L}]^{0/+}$  (X = X = CH<sub>3</sub>, NH<sub>2</sub>, Cl) complexes calculated by the GIAO(2c-SO-ZORA)/PBE0/TZ2P/COSMO computational protocol in benzene solution.

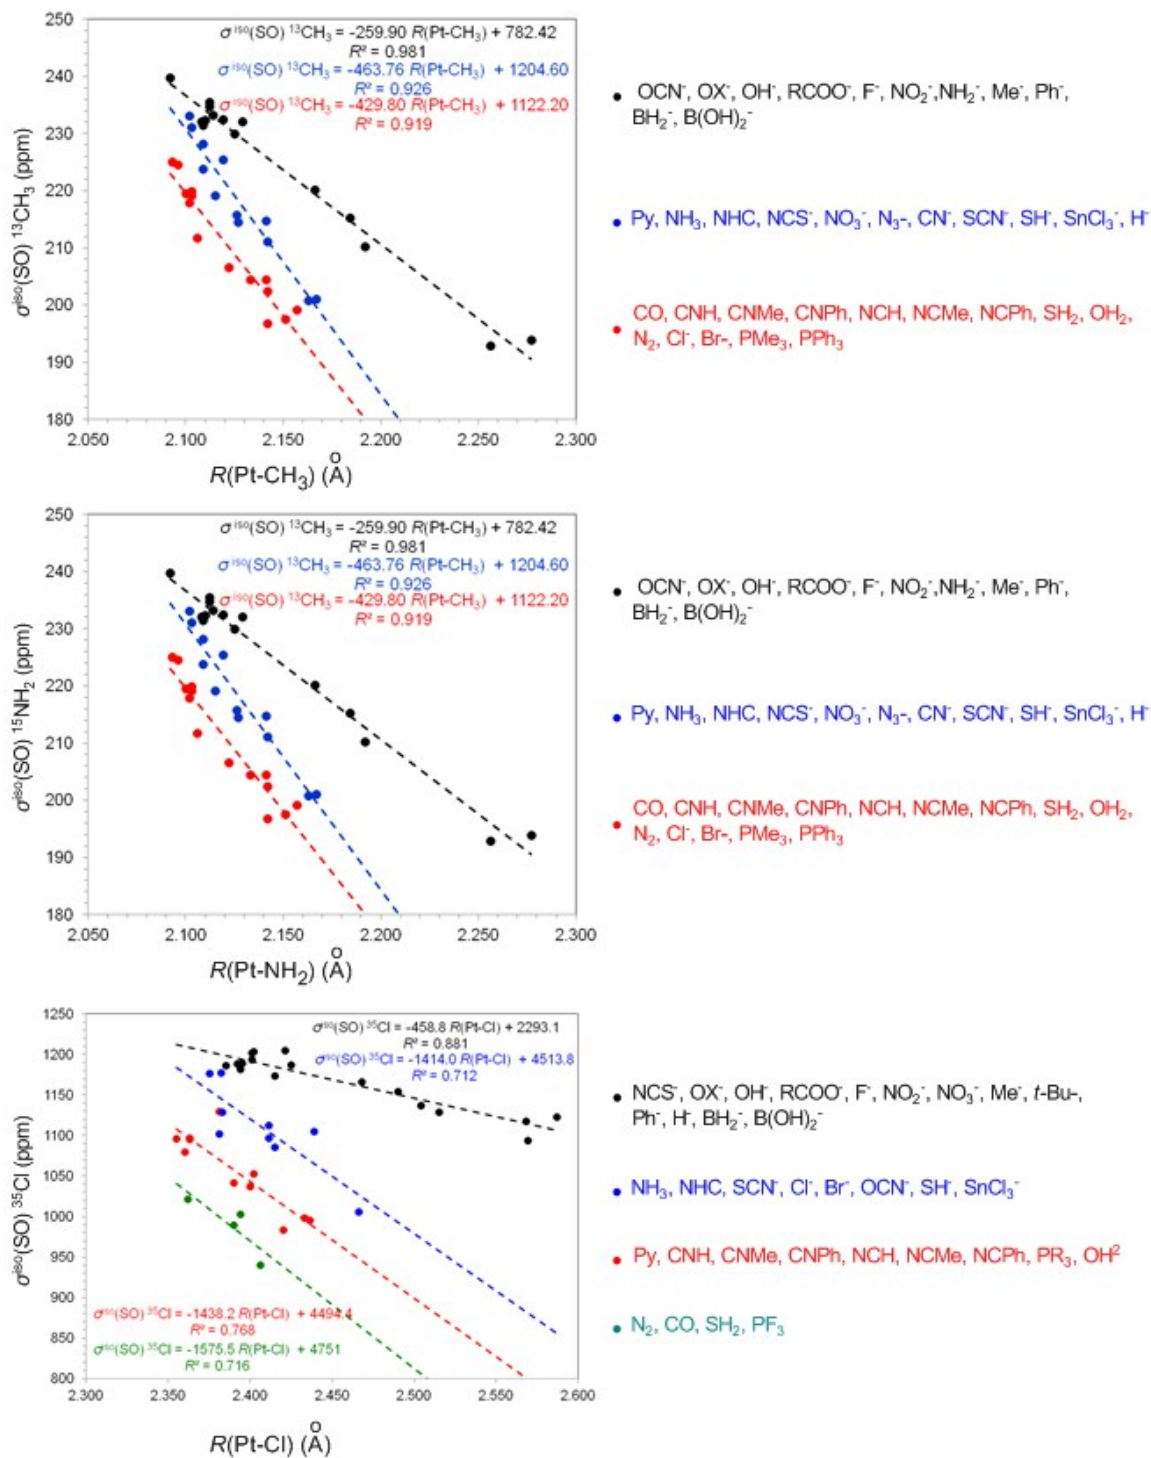

**Figure S2.** Linear plots of the  $\sigma^{\text{iso}}(\text{SO})$  X (X = CH<sub>3</sub>, NH<sub>2</sub>, Cl) shieldings vs  $R(\text{Pt-X})$  correlations for square planar *trans*-[Pt(PMe<sub>3</sub>)<sub>2</sub>(X)L]<sup>0/+</sup> (X = CH<sub>3</sub>, NH<sub>2</sub>, Cl) complexes calculated by the GIAO(2c-SO-ZORA)/PBE0/TZ2P/COSMO computational protocol in benzene solution.

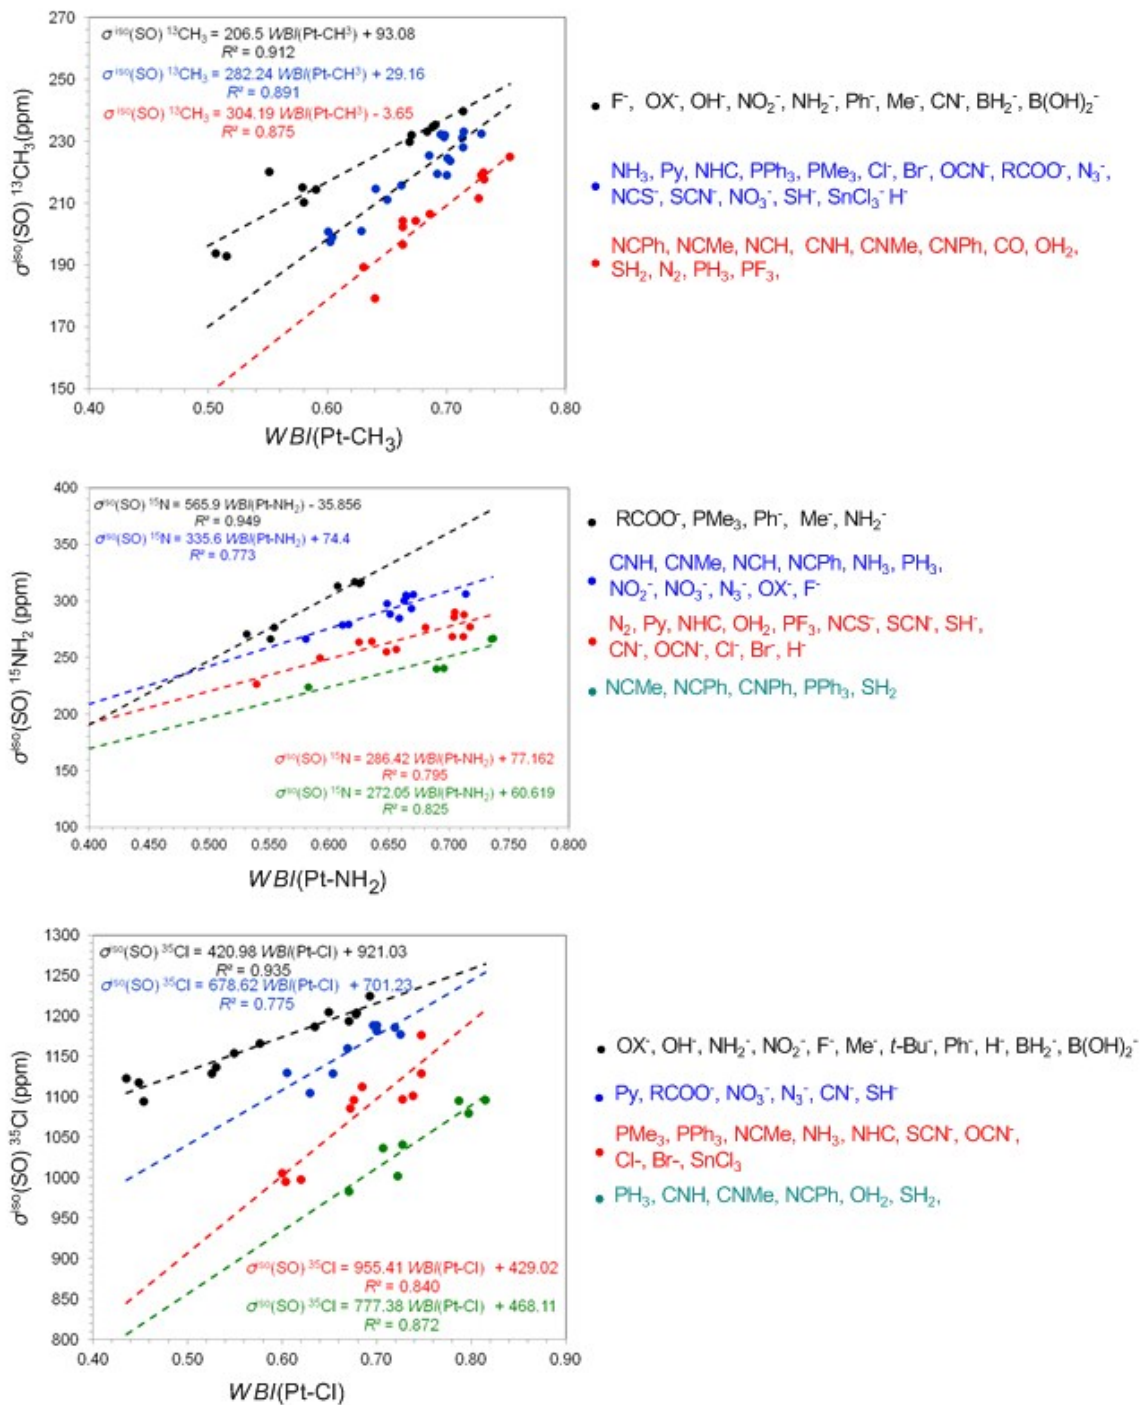

**Figure S3.** Linear plots of the  $\sigma^{\text{iso}}(\text{SO})$  X (X = CH<sub>3</sub>, NH<sub>2</sub>, Cl) shieldings vs  $\text{WBI}(\text{Pt-X})$  correlations for square planar  $\text{trans-}[\text{Pt}(\text{PMe}_3)_2(\text{X})\text{L}]^{0/+}$  (X = CH<sub>3</sub>, NH<sub>2</sub>, Cl) complexes calculated by the GIAO(2c-SO-ZORA)/PBE0/TZ2P/COSMO computational protocol in benzene solution.

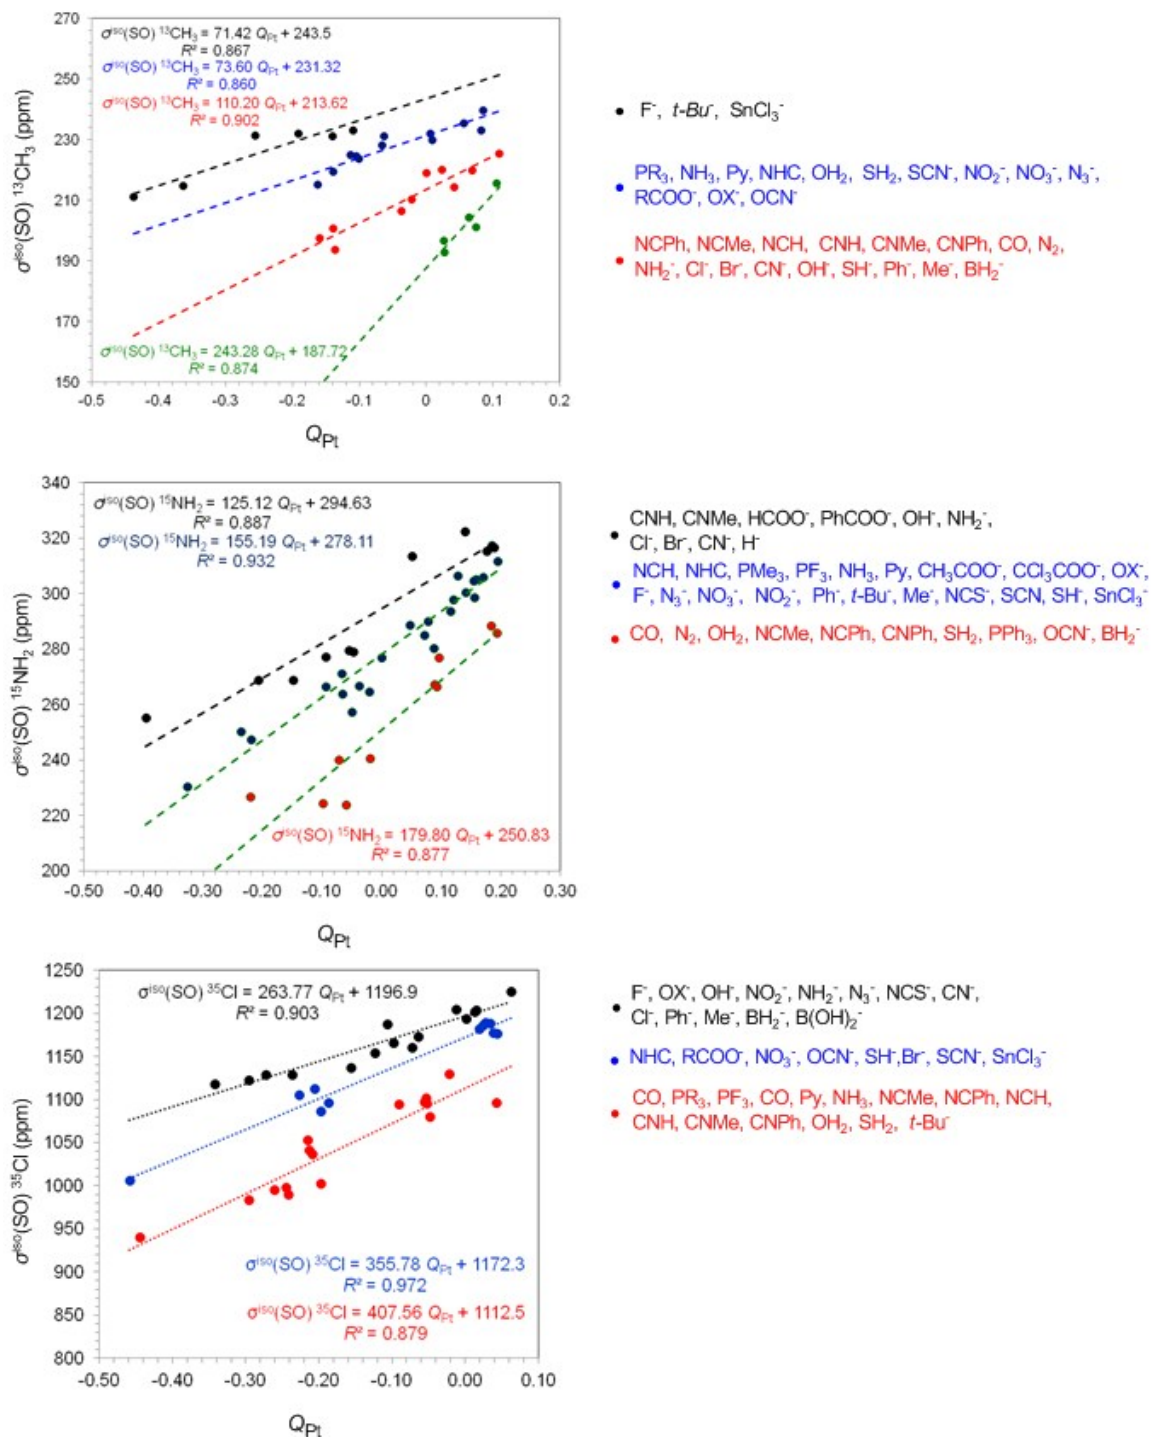

**Figure S4.** Linear plots of the  $\sigma^{\text{iso}}(\text{SO}) \text{ X}$  ( $\text{X} = \text{CH}_3, \text{NH}_2, \text{Cl}$ ) shieldings vs  $Q_{\text{Pt}}$  correlations for square planar *trans*- $[\text{Pt}(\text{PMe}_3)_2(\text{X})\text{L}]^{0/+}$  ( $\text{X} = \text{CH}_3, \text{NH}_2, \text{Cl}$ ) complexes calculated by the GIAO(2c-SO-ZORA)/PBE0/TZ2P/COSMO computational protocol in benzene solution.
